# Supplementary material for: The power of the ring: a pH-responsive hydrophobic epoxide monomer for superior micelle stability
Source: Royal Society of Chemistry journal article supplement (doi:10.1039/c7py01613a), 2017-01-01
Supplement: c7py01613a1.pdf [file c7py01613a1.pdf]

# The Power of the Ring: pH-Responsive Hydrophobic Epoxide Monomer for Superior Micelle Stability

*Jaeun Song,<sup>1</sup> L. Palanikumar,<sup>1</sup> Yeongkyu Choi,<sup>1</sup> Inhye Kim,<sup>4</sup> Tae-young Heo,<sup>5</sup> Eungjin Ahn,<sup>2</sup>  
Soo-Hyung Choi,<sup>5</sup> Eunji Lee,<sup>4</sup> Yuji Shibasaki,<sup>3</sup> Ja-Hyoung Ryu,<sup>1</sup> and Byeong-Su Kim<sup>1,2\*</sup>*

<sup>1</sup>Department of Chemistry, Ulsan National Institute of Science and Technology (UNIST),  
Ulsan 44919, Korea

<sup>2</sup>Department of Energy Engineering, Ulsan National Institute of Science and Technology  
(UNIST), Ulsan 44919, Korea

<sup>3</sup>Department of Chemistry and Bioengineering, Faculty of Engineering, Iwate University, 4-  
3-5 Ueda, Morioka, Iwate 020-8551, Japan

<sup>4</sup>Graduate School of Analytical Science and Technology, Chungnam National University,  
Daejeon 34134, Korea

<sup>5</sup>Department of Chemical Engineering, Hongik University, Seoul 04066, Korea

E-mail: bskim19@unist.ac.kr

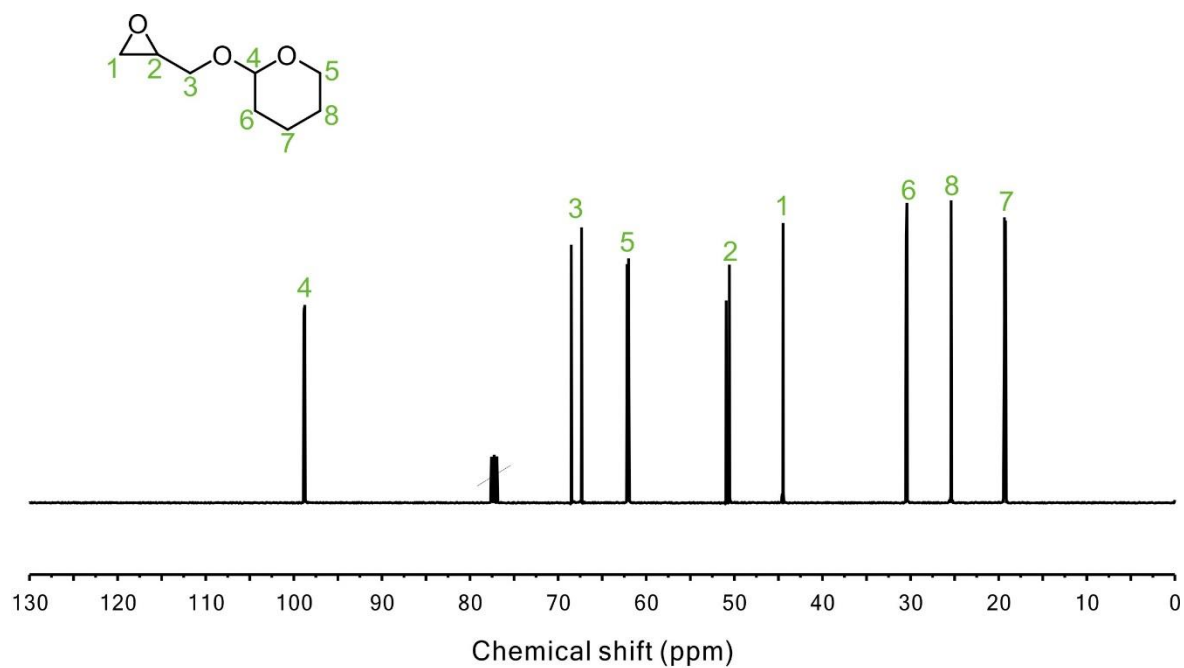

**Fig. S1**  $^{13}\text{C}$  NMR spectrum of TGE monomer (100 MHz,  $\text{CDCl}_3$ ).

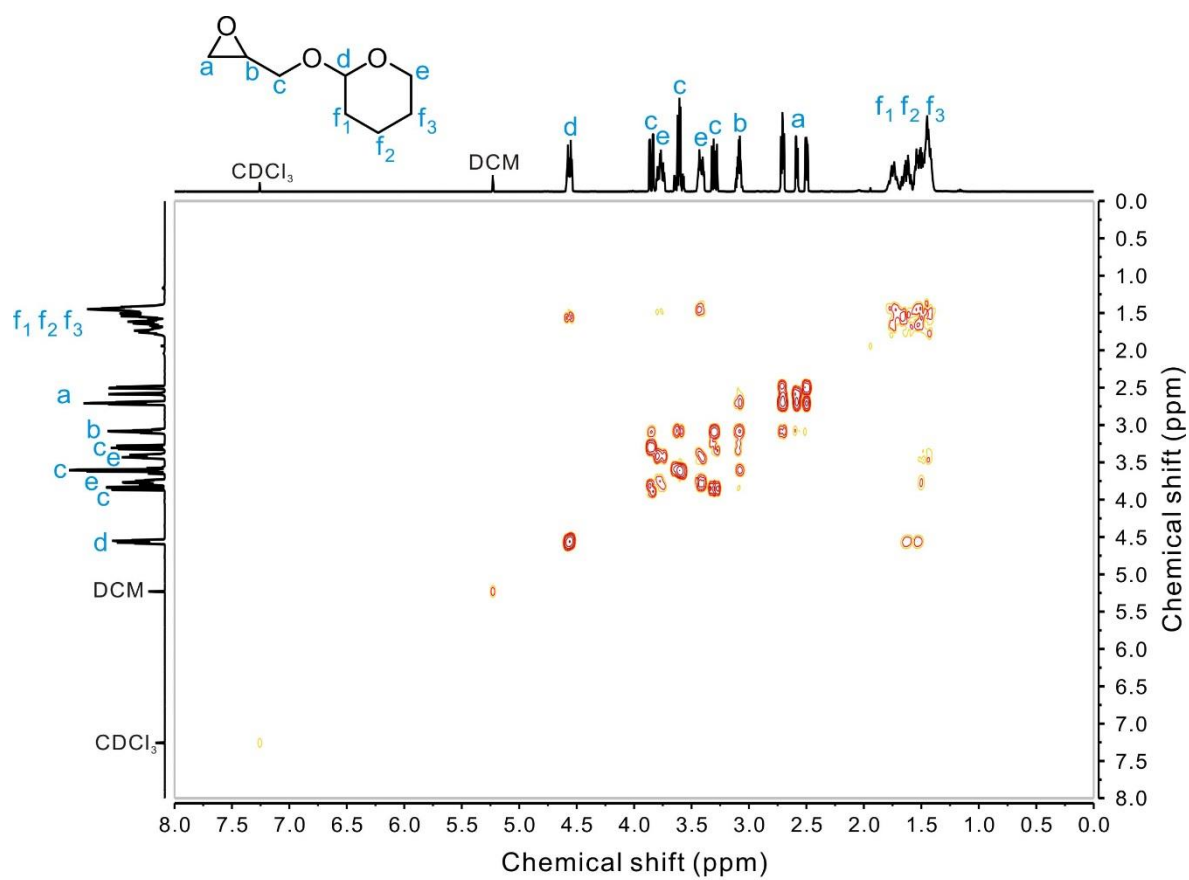

**Fig. S2**  $^1\text{H}$ - $^1\text{H}$  COSY NMR spectrum of TGE in  $\text{CDCl}_3$ .

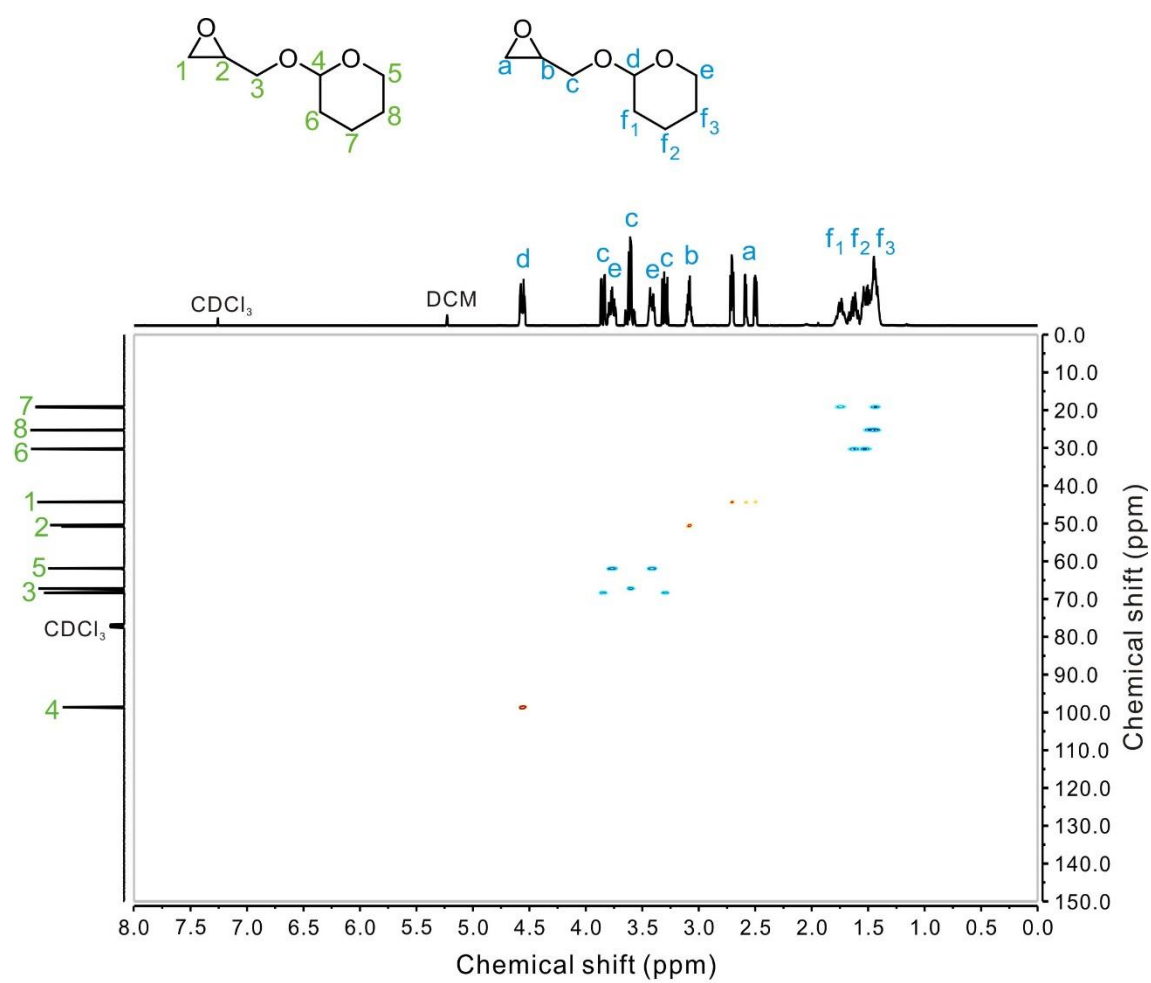

**Fig. S3** HSQC NMR spectrum of TGE in CDCl<sub>3</sub>.

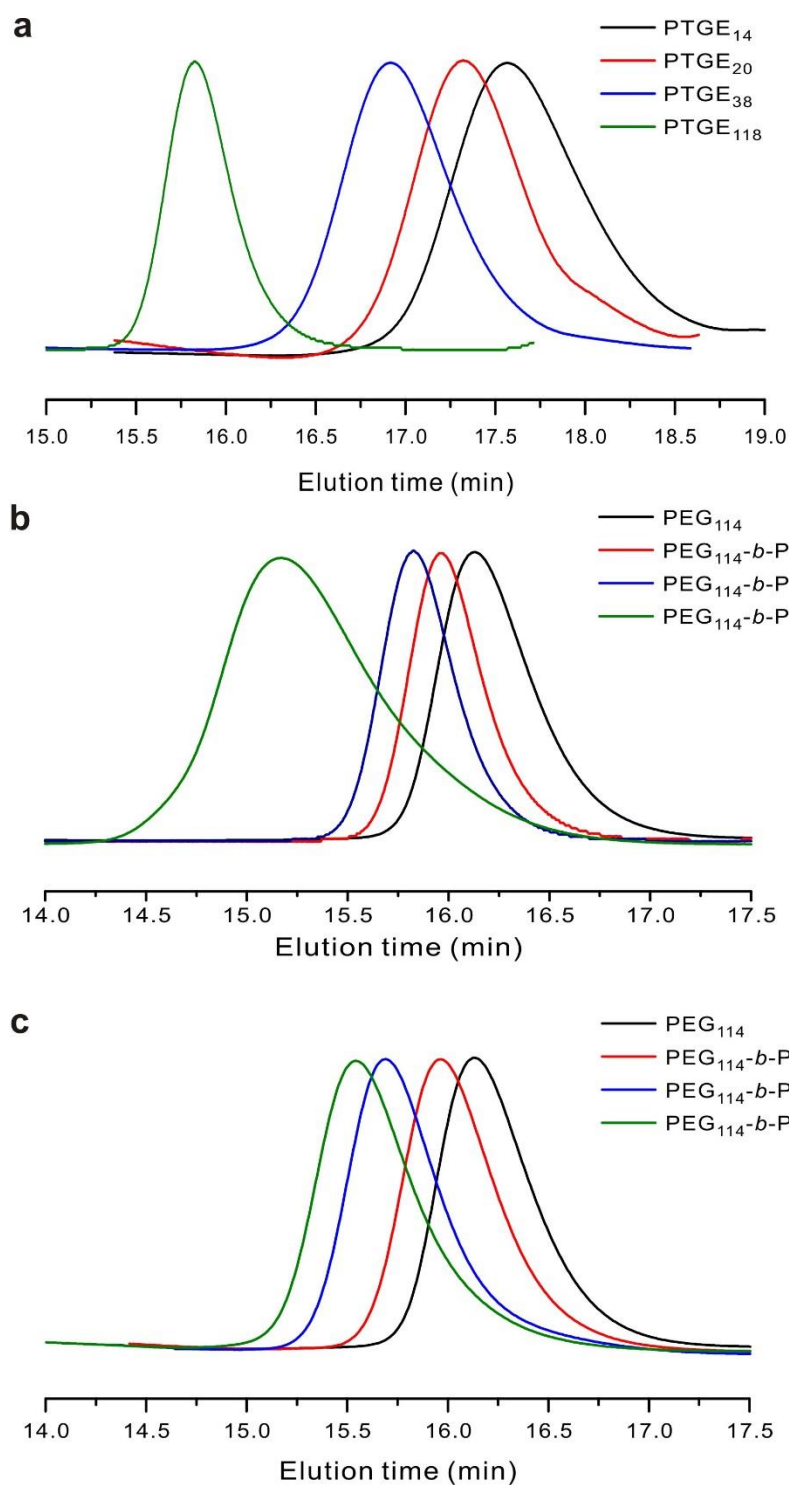

**Fig. S4** GPC elution traces in THF using an RI signal and PS as a standard of (a) homopolymer PTGE<sub>n</sub>, (b) block copolymer PEG<sub>114</sub>-*b*-PTGE<sub>n</sub> and (c) PEG<sub>114</sub>-*b*-PEEGE<sub>n</sub>.

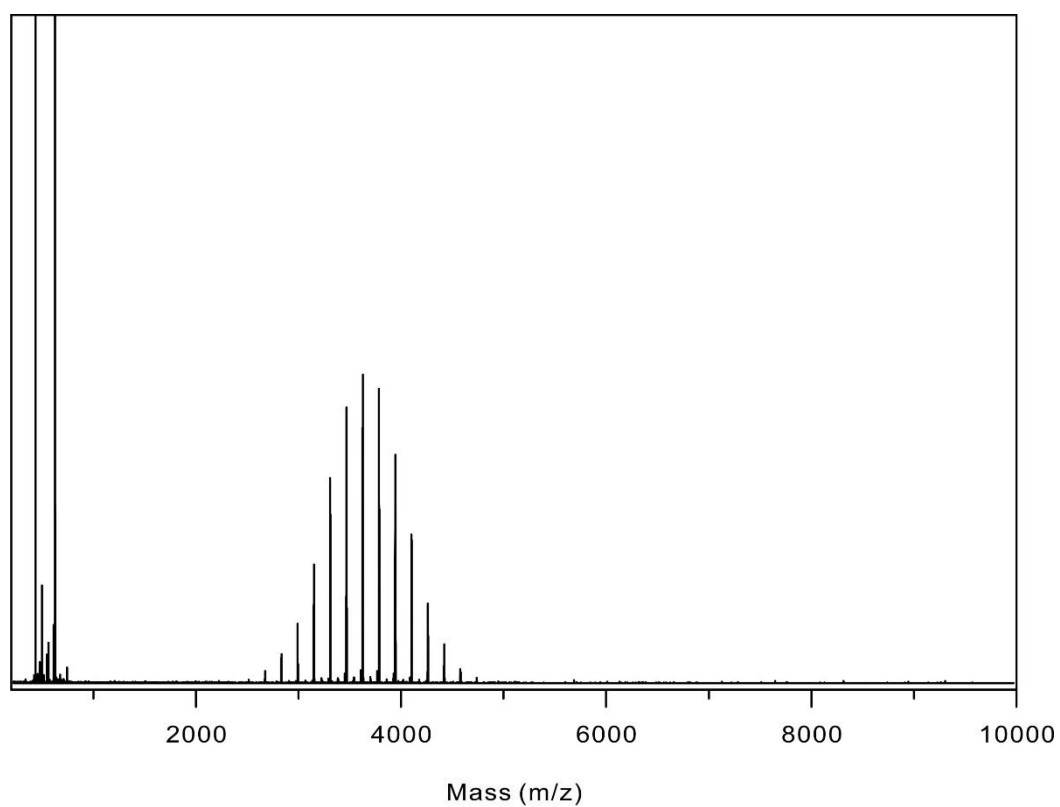

**Fig. S5** Full ranges of MALDI-ToF spectrum of the PTGE<sub>38</sub> homopolymer. (matrix:  $\alpha$ -cyano-4-hydroxycinnamic acid)

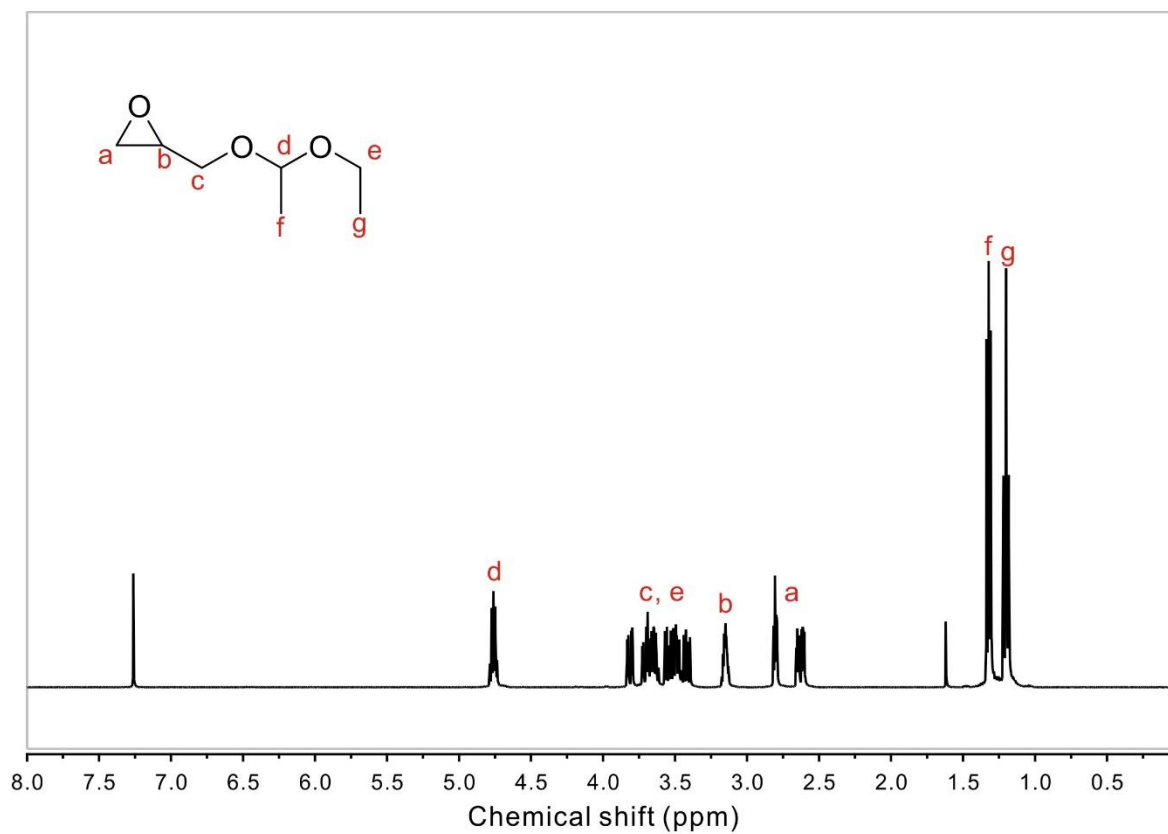

**Fig. S6** 400 MHz  $^1\text{H}$  NMR spectrum of EEGE in  $\text{CDCl}_3$ .

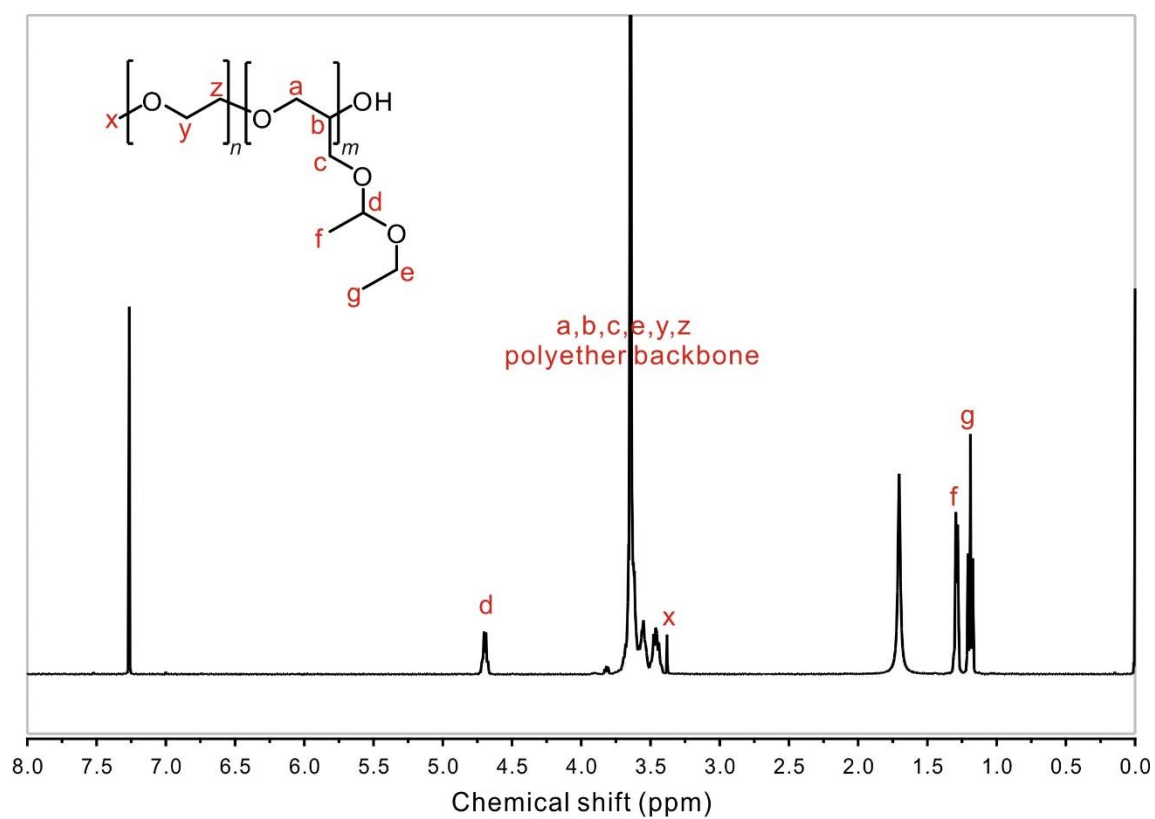

**Fig. S7** 400 MHz  $^1\text{H}$  NMR spectrum of PEG-*b*-PEEGE in  $\text{CDCl}_3$ .



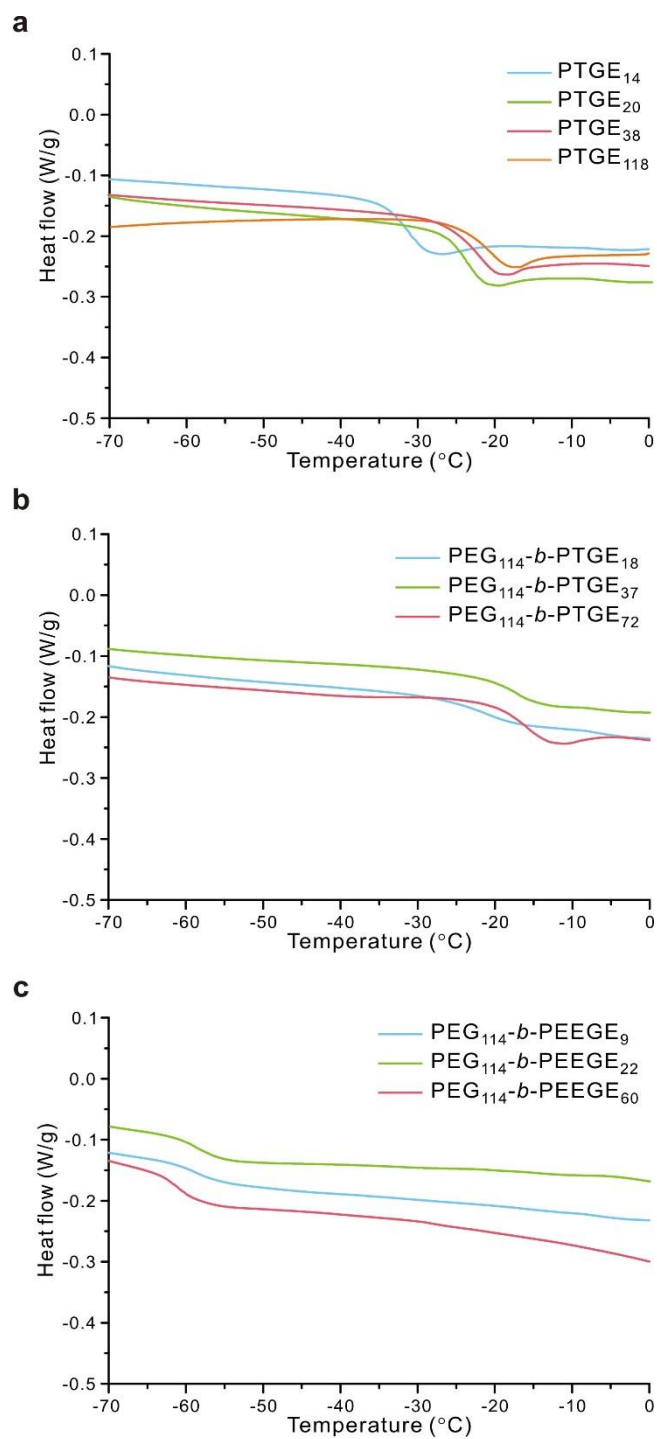

**Fig. S8** DSC thermograms for (a) homopolymer PTGE<sub>*n*</sub> (*n* = 14, 20, 38, and 118), (b) block copolymer PEG<sub>114</sub>-*b*-PTGE<sub>*n*</sub> (*n* = 18, 37, and 72), and (c) block copolymer PEG<sub>114</sub>-*b*-PEEGE<sub>*n*</sub> (*n* = 9, 22, and 60). The melting temperature of PEG block was observed at 50 – 54 °C.

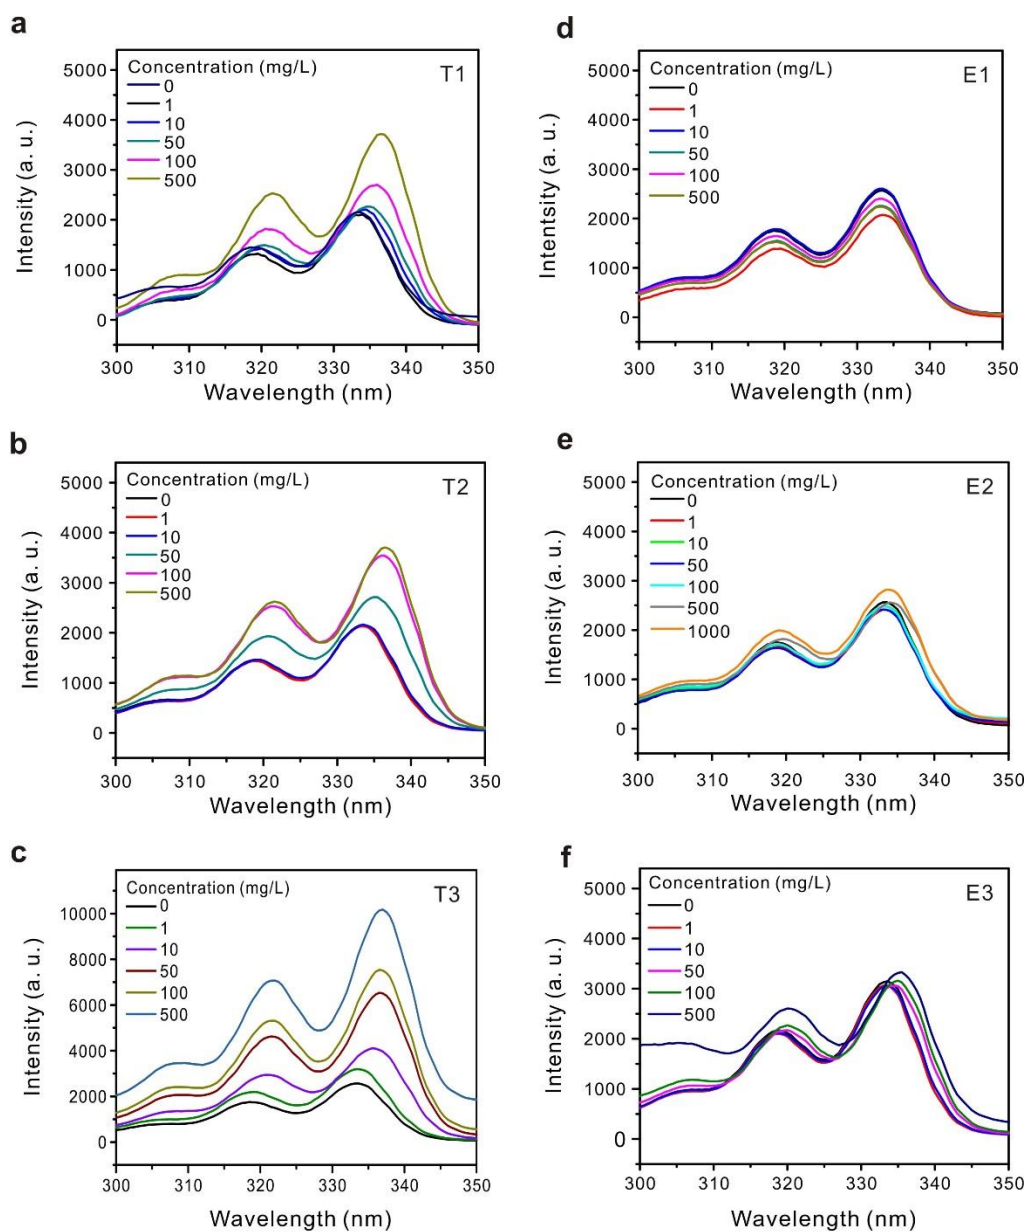

**Fig. S9** Excitation spectra of pyrene in aqueous solutions of (a) **T1**, (b) **T2**, (c) **T3**, (d) **E1**, (e) **E2**, and (f) **E3** micelles at concentrations ranging from 0 to 500 mg/L (emission wavelength of 372 nm)

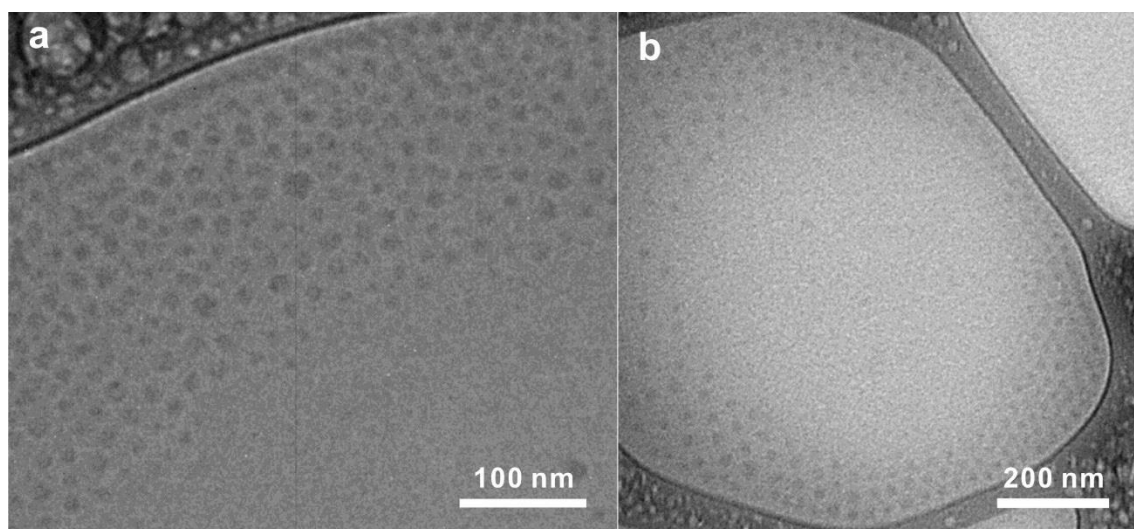

**Fig. S10** Cryo-TEM images of (a) **E2** and (b) **E3** micelles.

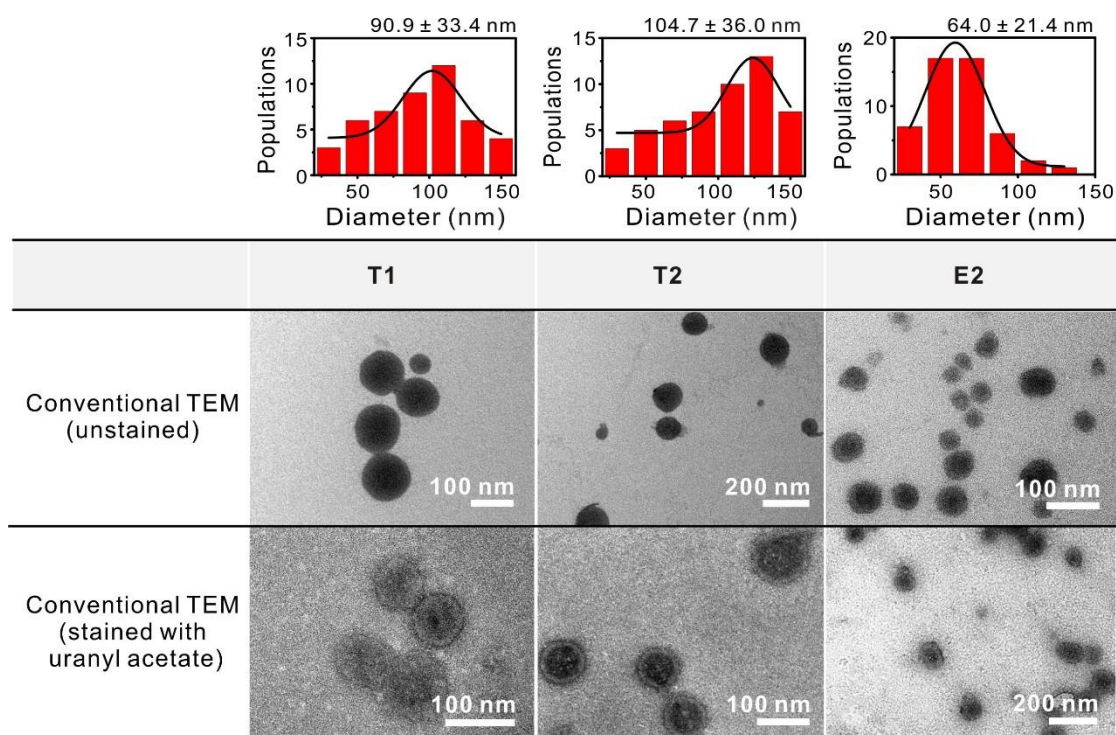

**Fig. S11** Conventional TEM images of **T1**, **T2** and **E2** micelles with and without staining. Conventional TEM can induce some artifacts or large aggregates of micelles during solvent evaporation. To prevent this structural transformation by solvent evaporation, cryo-TEM was performed.

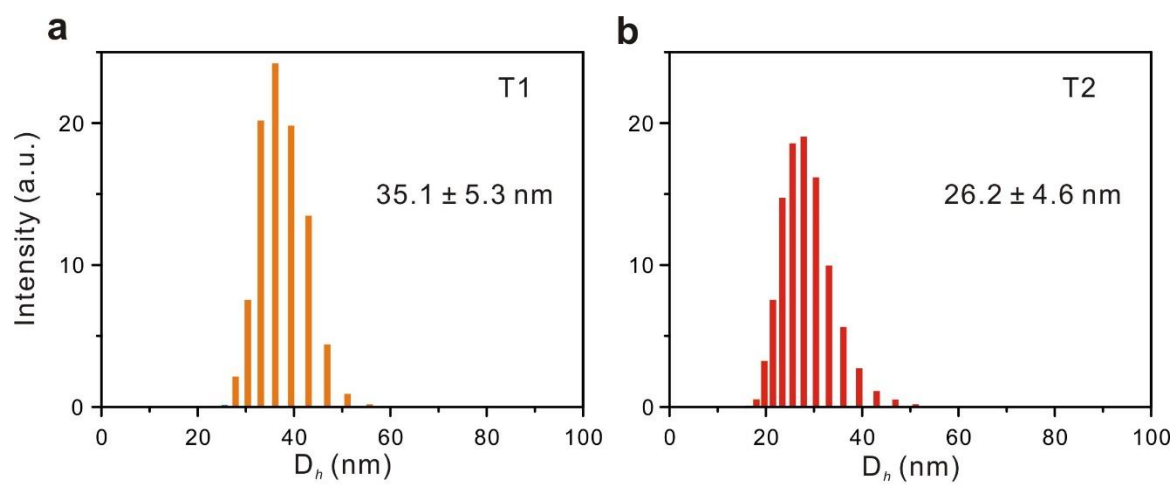

**Fig. S12** Size distribution of (a) **T1** and (b) **T2** micelles determined by DLS.

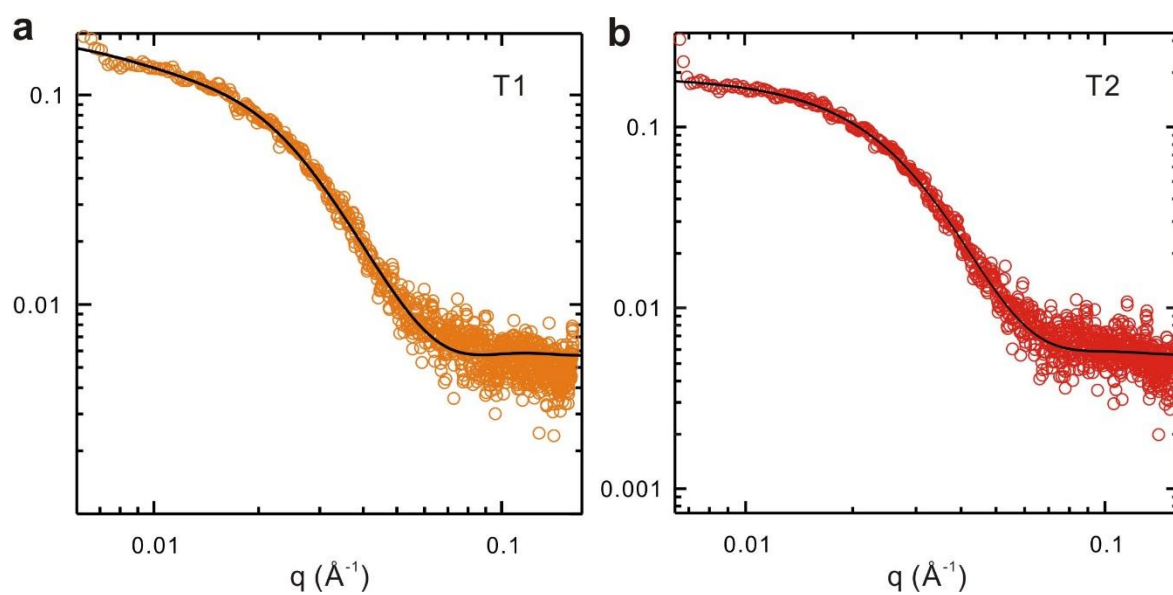

**Fig. S13** Size distribution of (a) T1 and (b) T2 micelles determined by SAXS curves.

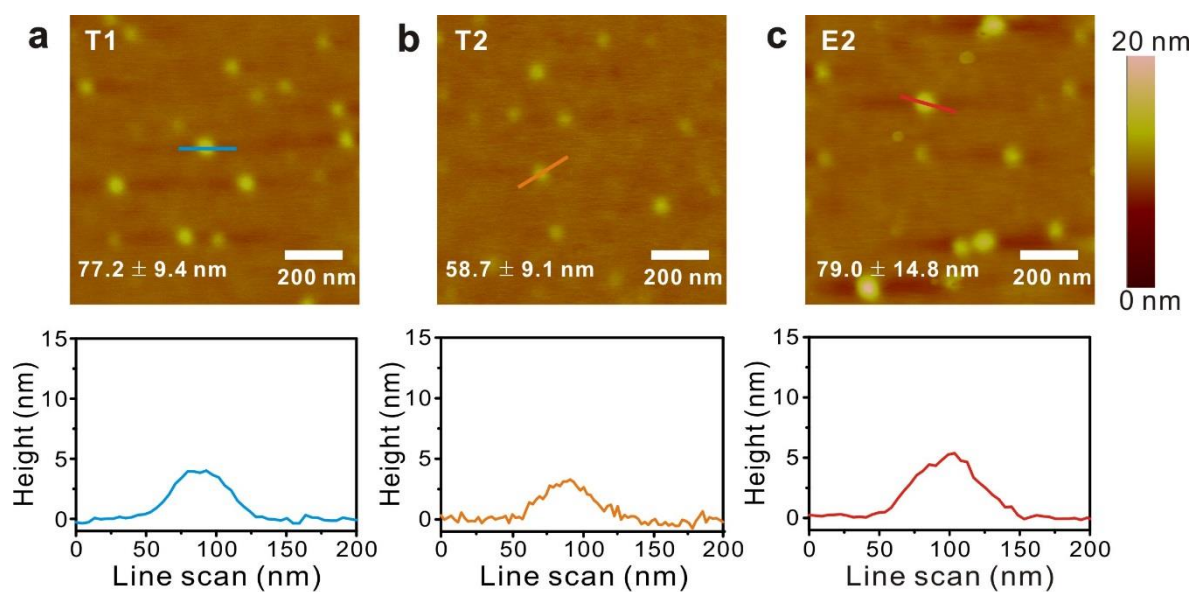

**Fig. S14** AFM images and heights of (a) **T1**, (b) **T2**, and (c) **E2** micelles with an average diameter of 77.2, 58.7 and 79.0 nm, respectively.

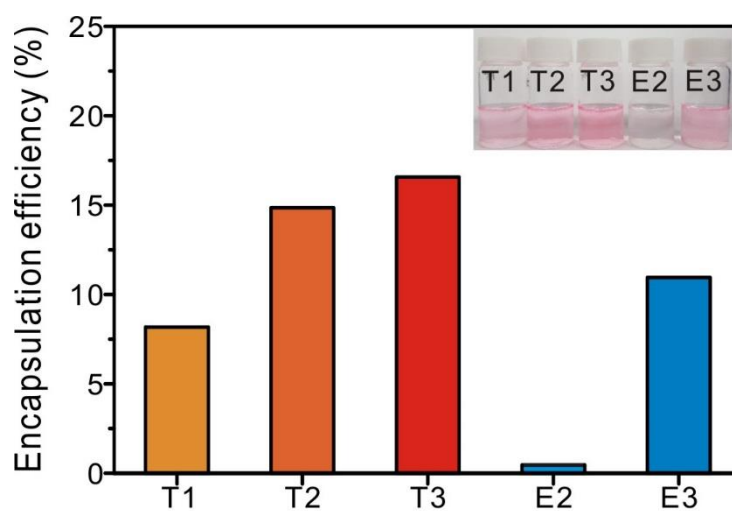

**Fig. S15** Encapsulation efficiency of Nile Red in all micelles. Inset shows the suspensions of micelles containing Nile Red with varying degrees of encapsulation efficiency.



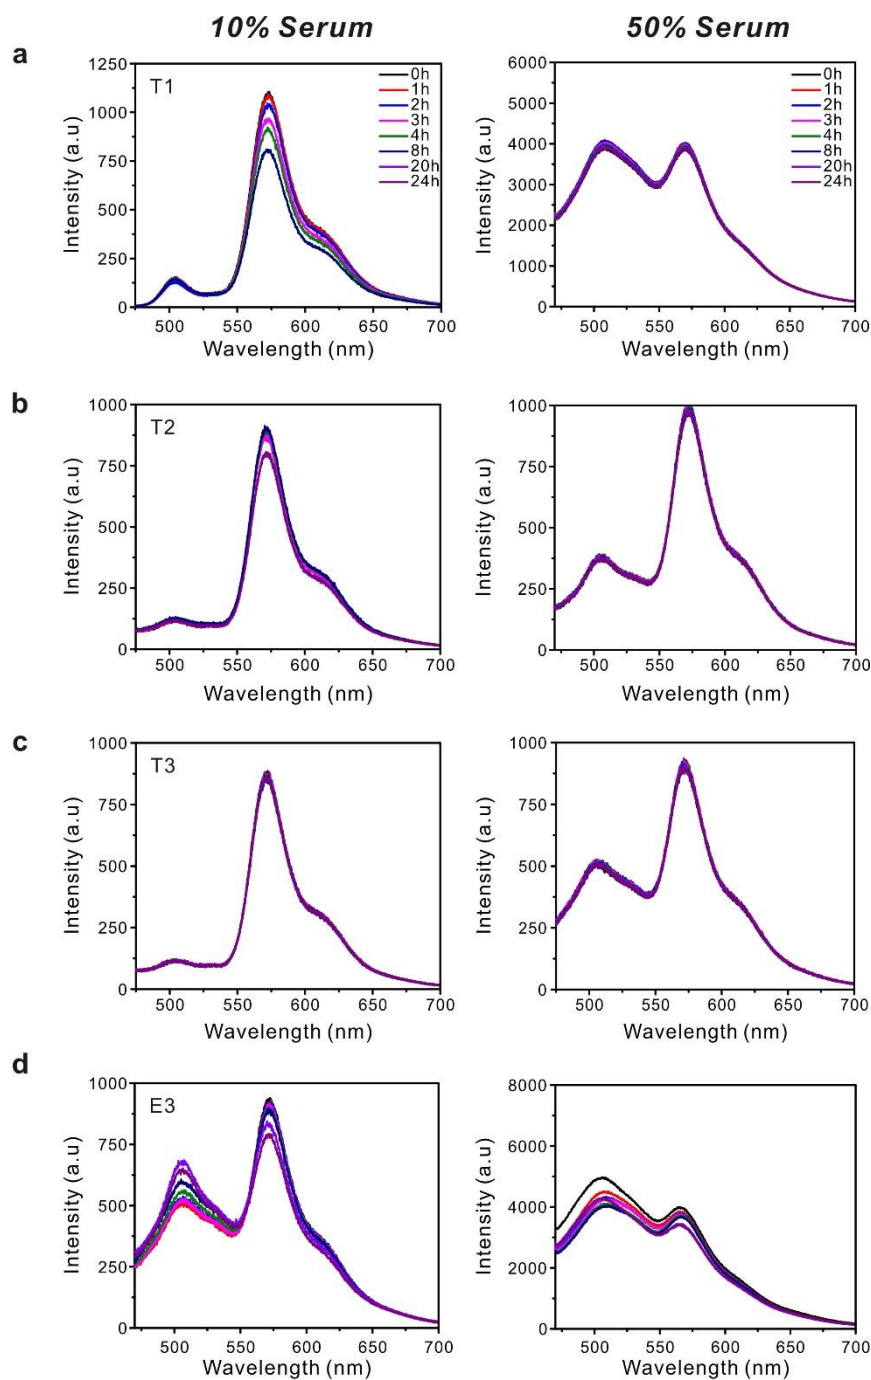

**Fig. S16** FRET based encapsulation stability analysis of (a) **T1**, (b) **T2**, (c) **T3** and (d) **E3** in 10% and 50% serum. Emission peak of DiO (FRET donor) observed at 510 nm and DiI (FRET acceptor) at 570 nm.

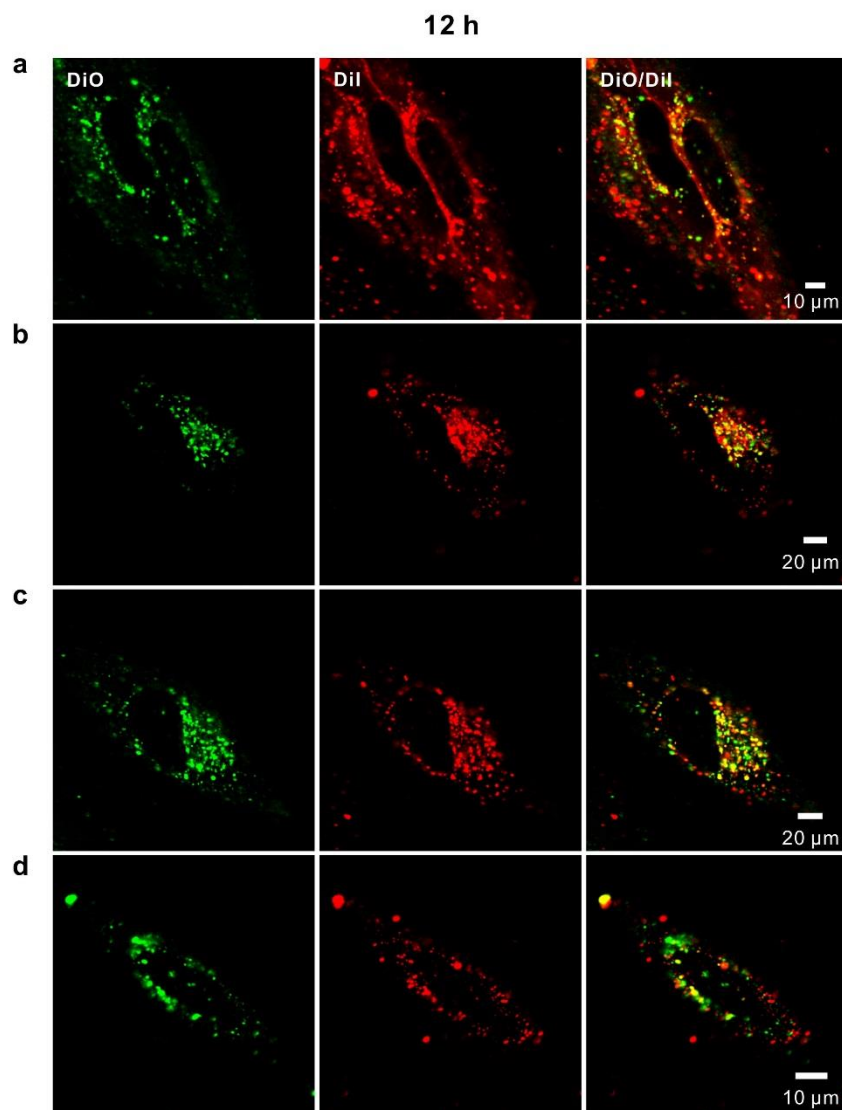

**Fig. S17** *In vitro* FRET disappearance studies for (a) **T1**, (b) **T2**, (c) **T3** and (d) **E3** after 12 h incubation by live imaging in HeLa cancer cells containing 10% FBS. Excitation and emission wavelengths for DiO were 488 nm and 535 nm, respectively. Excitation and emission wavelengths for DiI were 543 nm and 620 nm, respectively.

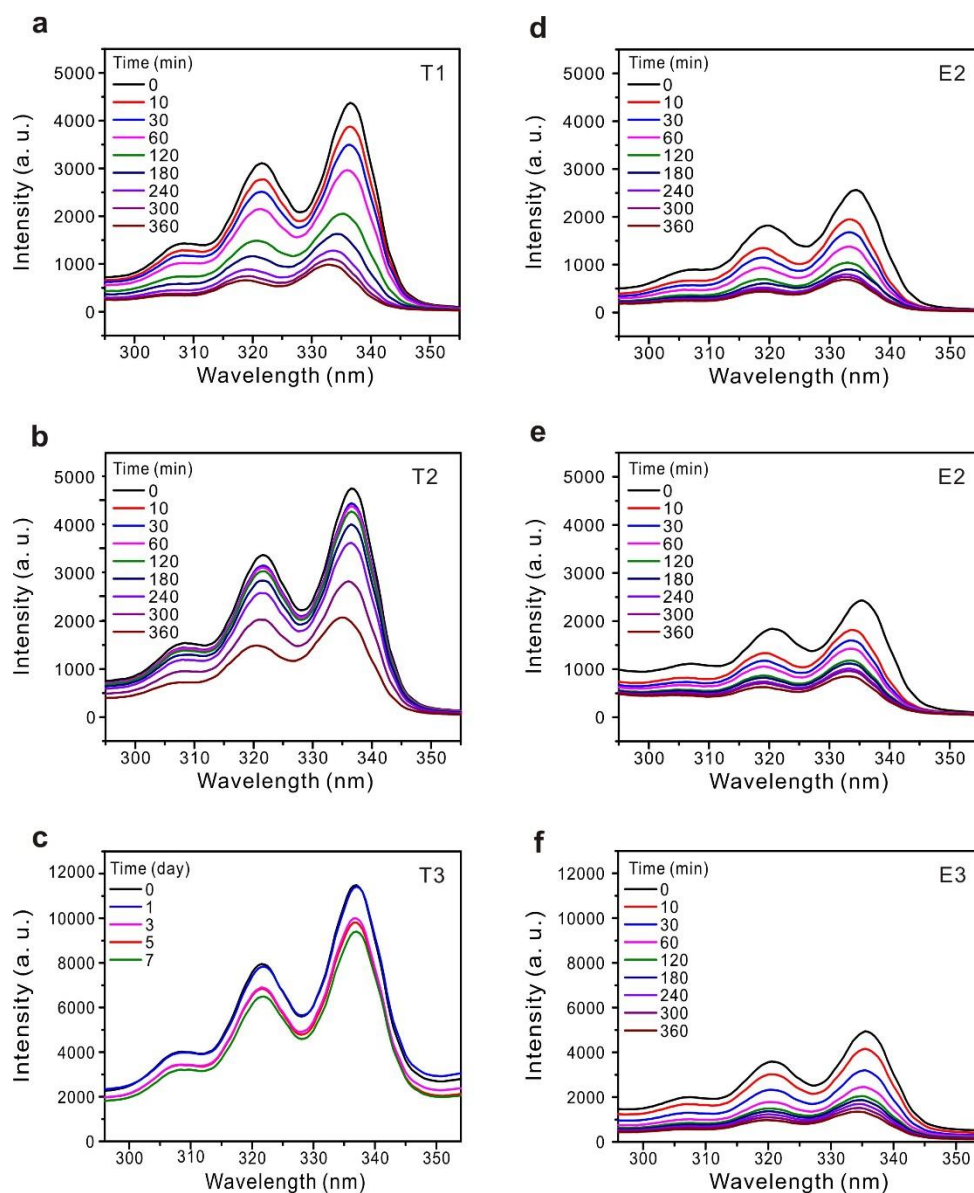

**Fig. S18** Changes in excitation spectra of pyrene encapsulated by (a) **T1**, (b) **T2**, (c) **T3**, (d) **E2**, (e) **E2** and (f) **E3** micelles after acid treatment. All samples contain 1.0 mg/mL of polymer except the sample in (e) which has a concentration of 5.0 mg/mL.

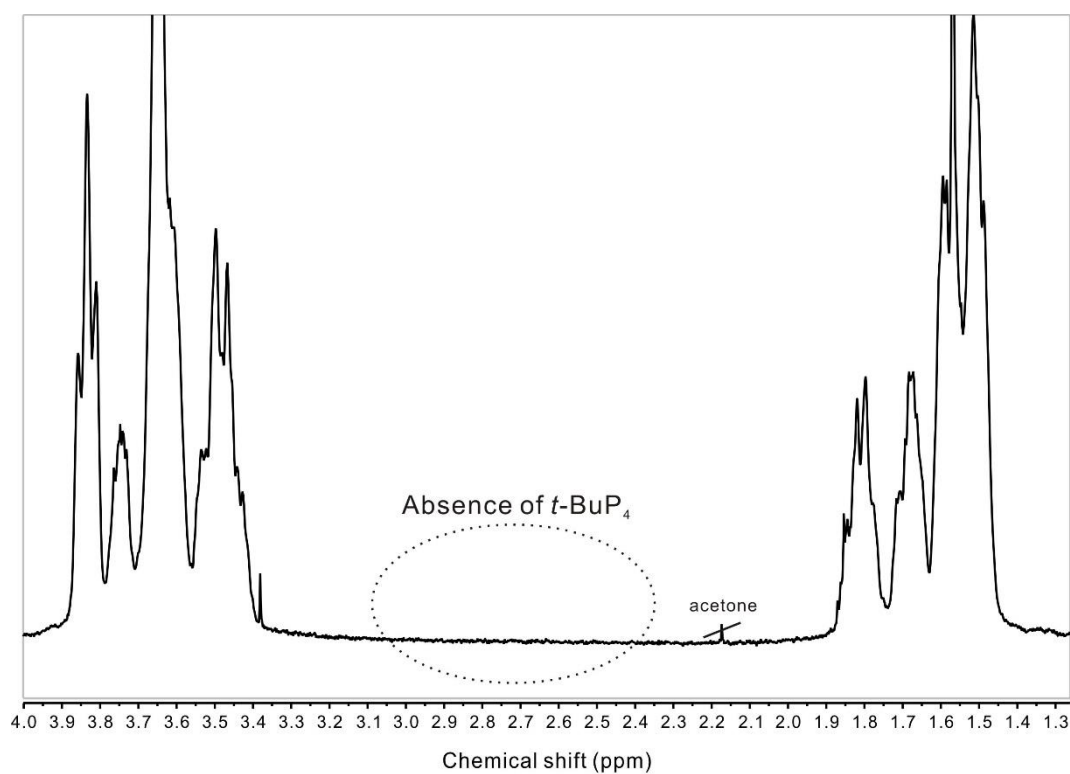

**Fig. S19** Expanded  $^1\text{H}$  NMR spectra of  $\text{PEG}_{114}\text{-}b\text{-PTGE}_{37}$ , displaying the clear disappearance of the residual phosphazene base,  $t\text{-BuP}_4$ .

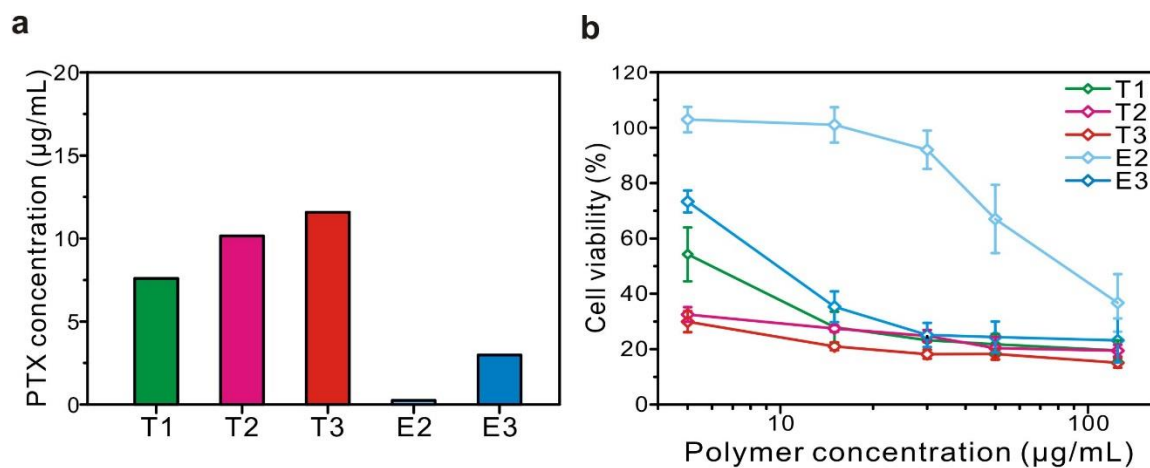

**Fig. S20** (a) PTX encapsulation efficiency of **T1**, **T2**, **T3**, **E2** and **E3** micelles at 5 mg/mL polymer concentration and (b) *in vitro* cell viability of PTX-loaded micelles.
